1 **Mycobacteria recycle their peptidoglycan *via* a novel pathway**  
2 **which influences antimicrobial resistance and limits proliferation**  
3 **in macrophages.**

4 Patrick J. Moynihan<sup>1\*</sup>, Ana Raquel Maceiras<sup>2,3</sup>, Ian T. Cadby<sup>1</sup>, Natacha Veerapen<sup>1</sup>, Monika  
5 Jankute<sup>1</sup>, Marialuisa Crosatti<sup>4</sup>, Galina V. Mukamolova<sup>4</sup>, Margarida Saraiva<sup>2,3</sup>, Andrew L.  
6 Lovering<sup>1</sup> and Gurdyal S. Besra<sup>1</sup>

7 **Affiliations:**

8 <sup>1</sup>Institute of Microbiology and Infection  
9 School of Biological Sciences  
10 University of Birmingham  
11 Birmingham, UK, B15 2TT

12  
13 <sup>2</sup>i3S- Instituto de Investigação e Inovação em Saúde  
14 Universidade do Porto, Porto, Portugal

15  
16 <sup>3</sup>IBMC - Instituto de Biologia Molecular e Celular  
17 Universidade do Porto, Porto, Portugal

18  
19 <sup>4</sup>University of Leicester,  
20 Leicester, UK, LE1 7RH

21  
22 \*To whom correspondence should be addressed:

23 Patrick J. Moynihan, Ph.D.,  
24 Institute of Microbiology and Infection  
25 School of Biological Sciences  
26 University of Birmingham  
27 Birmingham, UK, B15 2TT  
28 email: p.j.moynihan@bham.ac.uk  
29

30 **Abstract**

31 Growth and division by most bacteria requires remodeling and cleavage of their cell  
32 wall. A byproduct of this process is the generation of free peptidoglycan (PG) fragments known  
33 as muropeptides. These muropeptides are recycled in many model organisms, where the  
34 bacteria can harness their unique nature as a signal for cell wall damage. These molecules also  
35 serve as important signals for hosts where binding to specific receptors reports on the presence  
36 of intracellular bacteria. Despite this critical role for muropeptides, it has long been thought that  
37 pathogenic mycobacteria such as *Mycobacterium tuberculosis* do not recycle their PG. Herein  
38 we show that *M. tuberculosis* and *Mycobacterium bovis* BCG are both able to recycle  
39 components of their PG. We demonstrate that MurNAc but not GlcNAc can be metabolised by

40 mycobacteria and that stem-peptide recycling proceeds independent of amino sugar recovery.  
41 In addition, we demonstrate that the core-mycobacterial gene *lpqI* encodes an authentic NagZ  
42  $\beta$ -*N*-acetylglucosaminidase, which is essential for recycling MurNAc. Surprisingly, loss of *lpqI*  
43 leads to antimicrobial resistance and increased proliferation in macrophages. This supports a  
44 model whereby the amount of PG released by mycobacterial cells is tightly controlled in order  
45 to effectively modulate the infection process.

## 46 **Introduction**

47 For most bacteria maintenance of a peptidoglycan (PG) sacculus is an essential aspect  
48 of life. PG is a heteropolymer comprised of glycan chains with a repeating disaccharide motif  
49 of *N*-acetylglucosamine  $\beta$ 1  $\rightarrow$ 4 *N*-acetylmuramic acid (GlcNAc-MurNAc) which are then cross-  
50 linked to one another *via* short peptides attached to the C-3 D-lactyl moiety of MurNAc. The  
51 integrity of this macromolecule must be maintained under most growth conditions and its  
52 rupture leads to lysis and cell death<sup>1</sup>. As a result of this essentiality, it is vital that cells are able  
53 to withstand their own internal turgor pressure and still be able to cleave the cell wall to allow  
54 for division, growth and the insertion of macromolecular structures such as secretion systems<sup>1</sup>.  
55 Throughout this process, the activity of lytic enzymes or through the attack of host agents like  
56 lysozyme, the sacculus is cleaved with the resulting generation of small PG metabolites known  
57 as muropeptides<sup>2</sup>.

58 In Gram-positive bacteria muropeptides are typically released from the cell wall through  
59 the action of lysozyme-like hydrolytic enzymes, whereas in Gram-negative bacteria, lytic  
60 transglycosylases generate 1,6-anhydroMurNAc products<sup>3,4</sup>. These metabolites have been  
61 shown to be important in many aspects of host-pathogen interactions. For example, tracheal  
62 cytotoxin produced by *Bordetella pertussis* is the product of lytic transglycosylases<sup>5</sup>. Release  
63 of a similar molecule has also been shown to be involved in tissue damage during *Neisseria*  
64 *gonorrhoeae* infection and in the closure of the light-organ of the bobtail squid<sup>6,7</sup>. In many

65 organisms, soluble PG acts as a potent immune stimulator once sensed by NOD receptors and  
66 other pattern recognition receptors<sup>8</sup>.

67         Aside from host organisms, PG metabolites are also important signaling molecules for  
68 the bacteria themselves. For example, recycling of PG has been studied in great detail in a small  
69 number of organisms including *Escherichia coli*, *Pseudomonas aeruginosa* and *Bacillus*  
70 *subtilis* among others<sup>9</sup>. The recycling pathway typically involves the step-wise degradation of  
71 the polymer into its monomeric constituents, monosaccharides and amino acids (Figure 1).  
72 Despite common biochemical steps, compartmentalization of these steps tends to be organism  
73 specific<sup>3</sup>. The resulting monosaccharides are eventually phosphorylated and MurNAc-6-  
74 phosphate is converted into glucosamine-6-phosphate through the activities of cytoplasmic  
75 MurQ and NagA enzymes (Figure 1). At the same time, the stem peptides are degraded to  
76 smaller components and typically shunted back into PG biogenesis. As a result of its presence  
77 in many model organisms and pathogens, MurQ-deficient PG recycling has so far only been  
78 described in *Pseudomonas putida*, and many bacteria, including mycobacteria, are not thought  
79 to recycle their PG at all<sup>10</sup>.

80         The cell wall of *M. tuberculosis* is built upon a foundation of PG. The remainder of this  
81 structure is formed by the modification of muramic acid residues with an arabinogalactan  
82 polymer that is in turn esterified by mycolic acids<sup>11</sup>. This waxy coating contributes to drug  
83 resistance in *M. tuberculosis*, but is also the target of several mycobacteria-specific  
84 antibiotics<sup>11</sup>. The challenge of multi- and extensively-drug resistant *M. tuberculosis* has not  
85 adequately been met by drug discovery efforts, however recent reports suggest that  $\beta$ -lactams  
86 are effective at treating these drug-resistant infections<sup>12-14</sup>. Despite their therapeutic promise,  
87 we know relatively little about the turn-over of PG in mycobacteria, which is the eventual target  
88 of  $\beta$ -lactam antibiotics.

89           In the present study we sought to determine if mycobacteria are capable of recycling  
90 their PG and if so, what impact this has on the pathogenicity and immunogenicity of these  
91 organisms. We for the first time reveal that these bacteria do indeed possess the biochemical  
92 capacity to recycle PG elements and determined the molecular basis of MurNAc recovery. Our  
93 data indicate that loss of a key recycling enzyme, LpqI, leads to increased antibiotic and  
94 lysozyme resistance. Surprisingly, loss of this enzyme also leads to increased proliferation in  
95 murine bone-marrow-derived macrophages suggesting that PG-recycling plays an important  
96 role in maintaining balanced growth in the host.

## 97 **Materials and methods**

### 98 **Bacterial strains and growth conditions:**

99           *M. bovis* BCG (Pasteur) and related mutants were maintained on Middlebrook 7H10  
100 agar or 7H9 broth supplemented with 10% OADC enrichment and 0.05% Tween 80. Where  
101 appropriate kanamycin or hygromycin was added at 25 or 50  $\mu\text{g}\cdot\text{mL}^{-1}$ , respectively. *M.*  
102 *smegmatis* mc<sup>2</sup>155 were maintained on Tryptic Soy Broth or Tryptic Soy Agar where  
103 appropriate. For growth on defined carbon sources, strains were grown in Sauton's minimal  
104 medium (4 g asparagine, 2 g citric acid, 0.5 g K<sub>2</sub>HPO<sub>4</sub>, 0.5 g MgSO<sub>4</sub> \* 7 H<sub>2</sub>O and 0.05 g ferric  
105 ammonium citrate, 0.05% tyloxopol) containing either 5 mM of each sole-carbon unless stated  
106 otherwise<sup>15</sup>. *Escherichia coli* strains were grown in lysogeny broth and supplemented with  
107 kanamycin at 50  $\mu\text{g}\cdot\text{mL}^{-1}$  or hygromycin at 150  $\mu\text{g}\cdot\text{mL}^{-1}$  where appropriate.

### 108 **Mutant generation**

109           To generate the  $\Delta\text{lpqI}$  strain we used specialized transduction according to established  
110 protocols<sup>16</sup>. A recombinant *lpqI* knockout phage was designed to replace the chromosomal *lpqI*  
111 gene using homologous flanking regions to *lpqI* with a the *sacB* gene and a hygromycin  
112 resistance cassette in-between using the LL-Rv0237, LR-Rv0237, RR-Rv0237 and RL-Rv0237

113 primers (all primers are found in Table S2). The resulting phage was transduced into *M. bovis*  
114 BCG and transductants were selected on 7H10-agar plates containing 75  $\mu\text{g}\cdot\text{mL}^{-1}$  hygromycin.  
115 The mutant was verified by PCR and phenotypically with 4MU-GlcNAc where loss of *lpqI* was  
116 expected to abolish turn-over of this fluorescent substrate. The complemented strain was  
117 generated by incorporating the *lpqI* gene and 150 bp 5' to the start codon containing the  
118 promoter sequence into the promoter-less integrative mycobacterial shuttle vector pMV306  
119 using primers Rv0237CompF and Rv0237CompR to generate the resulting pMV306-*lpqI*  
120 plasmid<sup>17</sup>. This was electroporated into *M. bovis* BCG  $\Delta lpqI$  and transformants were selected  
121 on 7H10 agar containing hygromycin and kanamycin. The complemented mutant was verified  
122 phenotypically with 4MU-GlcNAc. A similar strain was constructed using the empty pMV306  
123 vector.

#### 124 **Antimicrobial testing**

125 Mid-exponential cultures of *M. bovis* BCG and derivative strains were diluted to the  
126 indicated OD<sub>600</sub> in fresh 7H9 media. 100  $\mu\text{L}$  of this culture was added to a 96-well plate with  
127 the addition of 1  $\mu\text{L}$  of antibiotic/lysozyme to achieve the desired final concentration as  
128 indicated. These were incubated for 7 days at 37 °C at which point 30  $\mu\text{L}$  of 0.02% w/v resazurin  
129 and 12.5  $\mu\text{L}$  of 20% Tween 80 v/v was added to the culture. This was incubated over-night at  
130 37 °C and the production of resorufin was determined by fluorescence (Ex. 530 nm, Em. 590  
131 nm) using a BMG Polarstar plate reader.

#### 132 **Rapid purification of mAGP**

133 Rapid purification of soluble peptidoglycan from small cultures was carried out using a  
134 modified phenol extraction protocol<sup>18</sup>. Mycobacterial cells were grown to mid-exponential  
135 phase and collected by centrifugation. These were washed with cold phosphate-buffered saline  
136 (PBS) and resuspended in PBS and the cells were lysed in a Percellys Evolution Bead Beater  
137 at 5,000 rpm for 3 min. The lysate was then transferred to glass culture tubes to which 2 mL of

138 98% phenol was added and vortexed for 1 min. This was heated for 1h at 70 °C, allowed to cool  
139 and the insoluble material was collected by centrifugation at 5,000 rpm. The aqueous phase was  
140 removed and 4 mL of methanol was added. This was vortexed and centrifuged again. Finally,  
141 the pellet was washed 3 times with methanol and once with water before being frozen or used  
142 for subsequent enzymatic treatment.

### 143 **Large-scale purification of PG**

144 Purification of PG from *M. smegmatis* was achieved following established protocols<sup>19</sup>.  
145 Six-liters of *M. smegmatis* were grown to mid-exponential phase at which point they were  
146 harvested by centrifugation, resuspended in a minimal volume of PBS and lysed by sonication.  
147 The resulting lysate was brought to 4% SDS and boiled under reflux for 3 h. The insoluble  
148 material was collected by centrifugation and washed with water until the SDS was completely  
149 removed (at least 7 washes) to yield mycolyl-arabinogalactan-peptidoglycan (mAGP). The  
150 mAGP was incubated for 4 days in 0.5% KOH in methanol at 37 °C before being washed three  
151 times with methanol. The mycolic acids were extracted with 3 washes of diethyl ether. The  
152 phosphodiester linking the AG-PG complex was cleaved using 0.2 M H<sub>2</sub>SO<sub>4</sub> and the PG was  
153 separated from the solubilized AG by centrifugation prior to neutralization with NaCO<sub>3</sub> and  
154 washed with water 3 times. The insoluble PG pellet was sequentially digested with  $\alpha$ -amylase  
155 (100  $\mu\text{g}\cdot\text{mL}^{-1}$ ), DNase (10  $\mu\text{g}\cdot\text{mL}^{-1}$ ) and RNase (5  $\mu\text{g}\cdot\text{mL}^{-1}$ ) for 8h before proteinase K (100  
156  $\mu\text{g}\cdot\text{mL}^{-1}$ ) digestion overnight at 37 °C. The PG pellet was resuspended in a minimal volume of  
157 1% SDS and boiled under reflux for 3 h before the SDS was removed by centrifugation and  
158 washing with water (at least 7 times). The resulting material was lyophilized and stored at -20  
159 °C until it was needed.

160 Digestion of cell wall material with mutanolysin was carried out overnight at 37 °C in  
161 20 mM ammonium acetate buffer (pH 6.0) with continuous mixing. Following digestion  
162 solubilised muropeptides were isolated using graphitized carbon solid-phase-extraction

163 cartridges as previously described<sup>20</sup>. Purified fractions were evaporated to dryness and the  
164 concentration of reducing sugars in the pool of soluble muuropeptides was assessed using the 3-  
165 methyl-2-benzothiazolinone hydrazone (MBTH) assay<sup>21</sup>.

#### 166 **Synthesis of 4MU-D-lactate**

167 Instead of the 2- or 3- step protocols published for the synthesis of 4MU-D-lactate previously,  
168 we used a simplified one step method<sup>22,23</sup>. 1.5 g of (s)-(-)-bromopropionic acid was added to 1  
169 g of 4-methylumbelliferone stirring in 40 mL anhydrous dimethylformamide and 0.75 g  
170 Cs<sub>2</sub>CO<sub>3</sub>. This was stirred at room temperature over-night and the product was extracted three  
171 times with water/ethyl-acetate and the organic phase was dried over sodium sulfate. The organic  
172 phase was then filtered and evaporated to dryness. The product was subsequently purified using  
173 silica chromatography and was dried as a crystalline white solid.

#### 174 **Turn-over of 4MU reporter compounds by *M. bovis* BCG**

175 To test turn-over of 4MU-GlcNAc or 4MU-D-lactate by whole cells, 100 µL of a mid-  
176 exponential culture (OD<sub>600</sub> = 0.6) was added to a sterile 96 well plate in Sauton's minimal media  
177 supplemented with 0.05% Tween and 1% glycerol in addition to 1 mM 4MU-D-lactate or 4MU-  
178 GlcNAc. Similar controls lacking cells or the reporter compound were included as well. This  
179 was incubated at 37 °C and mixed at 300 r.p.m. Each day the fluorescence of the sample was  
180 read on a BMC PolarStar microplate reader (Ex. 355 nm; Em 460 nm) with a constant gain  
181 setting.

#### 182 **Turn-over of *M. bovis* BCG PG *in vitro***

183 Cultures of *M. bovis* BCG wild-type,  $\Delta lpqI$ , and  $\Delta lpqI::lpqI$  were grown to an OD<sub>600</sub> of  
184 0.6 in the presence of 10 µCi <sup>3</sup>H *meso*-diaminopimelic acid (DAP), at which point they were  
185 collected by centrifugation, washed 3 times with sterile media and diluted to 0.01 in fresh  
186 culture flasks. Periodically a sample of 0.5 mL was taken, and the cells were collected by

187 centrifugation. The spent medium was mixed with 10 mL scintillation fluid and counted using  
188 a liquid scintillation counter. The cell pellet was re-suspended in 10% SDS, boiled for 20 min,  
189 and centrifuged again. The cell-wall material was then resuspended in 1 mL scintillation fluid  
190 and the material was counted in a liquid scintillation counter. The counts of the cell wall and  
191 the media were added together to give total  $^3\text{H}$  DAP in each culture and the data is presented as  
192 a percentage of that total. During the course of the experiment the  $\text{OD}_{600}$  of the culture was  
193 monitored daily. All measurements are from three biological replicates.

#### 194 **Cloning and purification of Rv0237**

195 Rv0237 was cloned from *M. tuberculosis* H37Rv into the T-A site of the Champion  
196 pET-SUMO expression plasmid (Invitrogen) using standard PCR conditions with the  
197 Rv0237SUMOF and Rv0237SUMOR primers. For production of Rv0237 1 L of *E. coli* BL21  
198 [pRv0237] grown in Terrific Broth to an  $\text{OD}_{600}$  of 0.6, chilled to 20 °C and induced with 1 mM  
199 IPTG and grown for a further 18 h before being collected by centrifugation. Cells were  
200 resuspended in 25 mM Tris-HCl, 300 mM NaCl, 10 mM imidazole pH 7.8 and lysed *via* three  
201 passages through a French pressure cell. The protein was purified using standard IMAC  
202 procedures with washes of lysis buffer, lysis buffer including 50 mM imidazole and finally  
203 eluted with 500 mM imidazole in lysis buffer. Eluted protein was dialysed exhaustively against  
204 25 mM Bis-Tris, 100 mM NaCl pH 7.8 in the presence of recombinant Ulp1 protease which  
205 specifically cleaves the His<sub>6</sub>-SUMO tag. Digested protein was subjected to a second IMAC  
206 column (1 mL HisTrap FF, GE Healthcare) and the flow-through fraction was found to contain  
207 pure, un-tagged Rv0237. Purified protein was dialysed into 25 mM Bis-Tris pH 6.5, 100 mM  
208 NaCl.

#### 209 **Crystallography**

210 Prior to crystallization, LpqI was concentrated to 20 mg•mL<sup>-1</sup> in 25 mM Bis-Tris pH  
211 7.5. LpqI crystals were grown by the sitting-drop vapour diffusion method by mixing an equal



212 volume of protein solution with 1.1 M sodium malonate, 0.1M HEPES, 0.5% v/v Jeffamine  
213 ED-2001 (pH 7.0). Crystals were cryo-protected with a saturated solution of sodium malonate  
214 and plunge frozen in liquid nitrogen. X-ray data was collected at the Diamond Light Source,  
215 Oxford. Data were processed using XiaII and file manipulations were performed using the  
216 CCP4 suite of programs. The structure was phased by molecular replacement using the  
217 previously released, but unpublished *M. smegmatis* LpqI structure (PDB: 4YYF) using the  
218 program PHASER. The structure was subsequently auto-built in PHENIX and the remaining  
219 parts were built in COOT with further refinement using PHENIX and PDB-REDO.

## 220 **Kinetic characterisation of Rv0237**

221 Purified Rv0237 was evaluated for glycoside hydrolase activity using a variety of  
222 substrates. As an initial screening assay, Rv0237 was incubated at 1  $\mu$ M with either 4-  
223 methylumbeliferyl or *p*-nitrophenyl derivatives of a variety of sugars as listed in Figure 4a in  
224 Bis-Tris pH 7.5, 100 mM NaCl at 37 °C. The release of *p*-nitrophenol was followed by change  
225 in absorbance at 420 nm while production of 4-methylumbelliferone was monitored by  
226 fluorescence as above in a BMG Polarstar spectrophotometer. Kinetic characterisation of  
227 Rv0237 was conducted using varying concentrations of 4MU-GlcNAc. The raw data were  
228 compared to standards of 4-methylumbelliferone. All data were analysed using GraphPad Prism  
229 7.

230 To evaluate the ability of the enzyme to degrade fragments derived from PG, *M.*  
231 *smegmatis* PG was digested with mutanolysin and soluble fragments were prepared and  
232 quantified as above. Reactions including 1  $\mu$ M Rv0237, 0.5 mM PG fragments in 25 mM  
233 ammonium acetate buffer pH 6.5 were incubated for 18h at 37 °C. In parallel reactions were  
234 carried out using *p*NP-GlcNAc in order to monitor enzyme activity visually. The reactions were  
235 then evaluated by TLC (Silica 60 F<sub>254</sub>, Merck, Germany) using a mobile phase consisting of 1-

236 butanol, methanol, ammonium hydroxide and water at a ratio of 5:6:4:1. TLCs were stained  
237 with  $\alpha$ -naphthol and developed by charring.

## 238 **Infection of bone marrow-derived macrophages**

239 BMDM were differentiated from bone marrow cells obtained from femurs and tibiae of  
240 C57BL/6 mice cultured in the presence of L-cell conditioned medium, as described before<sup>24</sup>.  
241 One million cells were infected with each *M. bovis* BCG strain at a multiplicity of infection  
242 (moi) of 2 bacteria: 1 macrophage. Four hours after infection, cells were washed 4 times with  
243 PBS (GIBCO) to remove extracellular bacteria. The adherent cells were cultured at 37°C in 1  
244 mL of cDMEM in the presence or absence of 100 U/mL of IFN- $\gamma$  for 96 hours. Four or 96 hours  
245 post-infection, 0.1% saponin (Sigma-Aldrich) in PBS was added to the wells and the cells were  
246 incubated at RT for 10 minutes to release intracellular bacteria. The number of viable bacteria  
247 was determined by plating 10-fold serial dilutions of the saponin treated cell suspensions in  
248 Middlebrook 7H11 supplemented with 10% OADC and 0.5% glycerol. Viable bacteria were  
249 determined by CFU enumeration after 21-28 days of incubation at 37°C<sup>24</sup>.

## 250 **Results**

### 251 **Peptidoglycan Recycling Genes in *Mycobacteria***

252 The genome of *M. tuberculosis* encodes many lytic enzymes, including at least five  
253 Resuscitation Promoting Factors (Rpfs) and greater than 10 peptidases and amidases in addition  
254 to penicillin binding proteins with potential lytic activities<sup>25</sup>. The Rpfs are most likely lytic  
255 transglycosylases with the product of RpfB having been recently confirmed as a GlcNAc-1,6-  
256 anhydroMurNAc disaccharide<sup>26</sup>. While *M. tuberculosis* does appear to encode at least one  
257 GH25-lysozyme, Rv2525, its activity has not been conclusively demonstrated<sup>27</sup>. A recent  
258 comparative study of PG-active enzymes in mycobacteria indicated that while significant  
259 differences exist, enzymes that can likely degrade all of the major covalent linkages of PG are

260 encoded in the genomes of all mycobacteria<sup>25</sup>. The products of most of these enzymes have not  
261 been experimentally demonstrated, however their conservation underscores the importance of  
262 PG-remodeling during growth and division of mycobacteria.

263 Most autolytic enzymes produce small PG-metabolites (muropeptides), indicating that  
264 mycobacteria should generate these molecules during the course of normal growth. Indeed,  
265 soluble PG fragment release has been observed for both *M. smegmatis* and *M. tuberculosis in*  
266 *vitro*<sup>18,28</sup>. We hypothesized that a recycling system for these muropeptides is likely to also exist  
267 in mycobacteria and analyzed the genomes of several mycobacteria for known PG-recycling  
268 systems including the recently discovered systems of *Pseudomonas putida* and *Tannerella*  
269 *forsythia* (Table S1, Figure 1)<sup>10,29</sup>. BLAST analysis of the *Corynebacterium glutamicum*, *M.*  
270 *tuberculosis*, *Mycobacterium leprae* and *Mycobacterium bovis* BCG genomes indicates that  
271 they lack genes related to any known muropeptide import proteins, PG-metabolite  
272 phosphorylation systems, and *murQ*. The only sugar-kinase orthologs identified in the genome  
273 have previously been characterized as glucose-kinases although they have not been directly  
274 tested for amino sugar-phosphotransferase activity<sup>30</sup>. This contrasts sharply with *M. smegmatis*  
275 for which an apparently complete “classical” muropeptide recovery system exists, making it a  
276 poor PG metabolism model for *M. tuberculosis* (Table S1). The *M. tuberculosis*, *M. leprae*, *C.*  
277 *glutamicum* and *M. bovis* BCG genomes do, however, appear to encode orthologs of NagA and  
278 NagZ. These enzymes are predicted to be an *N*-acetylglucosamine-6-phosphate *N*-deacetylase  
279 and a GH3-family  $\beta$ -*N*-acetylglucosaminidase respectively<sup>31,32</sup>. NagZ in particular is typically  
280 associated with PG recycling, whilst NagA is typically associated with the assimilation of  
281 GlcNAc regardless of the source.

## 282 **Utilisation of peptidoglycan components by mycobacteria**

283 Prior research has shown that most mycobacteria are unable to use GlcNAc as a sole  
284 carbon source, with *M. smegmatis* being one of the notable exceptions<sup>33</sup>. Furthermore, amino

285 acids including L-Ala, L-Glu, and L-Asp have previously been shown to serve as nitrogen  
286 sources for *M. tuberculosis* H37Rv<sup>34</sup>. To our knowledge, recycling of GlcNAc or MurNAc has  
287 not been reported, nor has recycling been evaluated for soluble PG fragments. To evaluate this,  
288 *M. bovis* BCG was cultured in minimal media supplemented with glycerol (1% v/v) or MurNAc  
289 (0.2% w/v) in Sauton's minimal media with constant aeration (Figure 2a). To confirm that this  
290 was not a phenotype specific to *M. bovis* BCG we also evaluated the ability of *M. tuberculosis*  
291 H37Rv to grow on the same carbon sources with identical results (Figure 2b) Intriguingly this  
292 growth was heavily dependent on the availability of oxygen. In contrast, growth on glycerol  
293 was unaffected by this change (Figure 2c). To further evaluate the potential for simple re-use  
294 rather than metabolism of GlcNAc we tested the ability of *M. bovis* BCG to incorporate <sup>14</sup>C  
295 GlcNAc into whole cells. Under different growth conditions (rich medium, carbon-poor  
296 medium, aerated cultures, static cultures) we were unable to detect significant amounts of  
297 GlcNAc being taken up by *M. bovis* BCG. In all cases the c.p.m. of the label in whole-cells was  
298 less than that of unlabeled controls.

### 299 **Mechanism of MurNAc metabolism**

300 The ability of *M. tuberculosis* and *M. bovis* BCG to grow on MurNAc was surprising  
301 and so we evaluated the biochemical processing steps associated with MurNAc utilization.  
302 MurNAc is a combination of GlcNAc and D-lactate joined by an ether linkage. This suggests  
303 that the bacterium is likely either using the GlcNAc moiety for glycolysis, or shunting the lactate  
304 derived from MurNAc into the TCA cycle. We tested this inhibiting by glycolysis with 2-  
305 deoxyglucose (2DG) in cultures grown using MurNAc, glucose and glycerol as sole carbon  
306 sources (Figure S1). These data suggested that the pathway of MurNAc utilization did not  
307 require glycolysis and indicated that lactate instead was likely serving as a carbon source.  
308 Consistent with this, when used as a sole carbon source, growth on L-lactate and MurNAc was  
309 O<sub>2</sub> dependent while D-lactate was better utilized under static, 5% CO<sub>2</sub> culture conditions, where  
310 MurNAc could not be used as a carbon source (Figure 2c).

311           These data allow us to hypothesize a mechanism by which *M. bovis* BCG metabolises  
312 MurNAc. Given that metabolism of L-lactate and MurNAc are O<sub>2</sub>-dependent, we anticipate that  
313 use of MurNAc follows cleavage of the D-lactate from MurNAc *via* an inverting mechanism to  
314 produce L-lactate and GlcNAc. In this case, the O<sub>2</sub>-dependency on MurNAc metabolism is  
315 likely the result of an O<sub>2</sub>-dependent lactate monooxygenase. Consistent with this, two O<sub>2</sub>-  
316 dependent L-lactate monooxygenases have been identified in *M. tuberculosis* (Rv0694,  
317 Rv1872c)<sup>35</sup>. Generation of free lactate by the bacterium would require the activity of a lactyl-  
318 etherase enzyme. To test for the presence of this activity we synthesized a 4MU-D-lactate  
319 derivative to serve as a reporter-analog of MurNAc (Figure S2). Consistent with the presence  
320 of a lactyl etherase, cultures of *M. bovis* BCG were able to release 4MU from this compound  
321 during the course of growth (Figure 2d).

### 322 **Uptake of PG metabolites by mycobacteria**

323           While our data strongly support metabolism of MurNAc by *M. bovis* BCG, confirmation  
324 of PG-recycling requires demonstration of the uptake of muropeptides by the bacterium. To  
325 investigate this, we generated radio-labelled muropeptides and tested them in whole-cell uptake  
326 assays to determine if mycobacteria are competent for recycling this more complex substrate.  
327 Muropeptides had to be generated in *M. smegmatis* due to the inability of *M. bovis* BCG to take-  
328 up <sup>14</sup>C GlcNAc under the conditions we tested. As shown in Figure 3a, *M. bovis* BCG was able  
329 to incorporate approximately 4% of the muropeptide-associated <sup>14</sup>C radio-label added to the  
330 culture. We next sought to determine if components of the stem-peptide were also recycled.  
331 The above experiments were repeated using <sup>3</sup>H-DAP-labelled muropeptides. This material was  
332 also incorporated into whole cells at a rate of approximately 7% of the added label (Figure 3a).  
333 We next evaluated the turn-over of muropeptides in whole cells using <sup>3</sup>H-DAP due to the  
334 inability of *M. bovis* BCG to incorporate <sup>14</sup>C GlcNAc into its cell wall. As shown in Figure 3c,  
335 *M. bovis* BCG very slowly releases DAP to the culture media *in vitro*. Consistent with a PG-  
336 recycling system we also found that soluble PG could serve as a sole carbon source for *M. bovis*

337 BCG under aerated conditions (Figure 3d). Together, these results indicate that pathogenic  
338 mycobacteria possess the biochemical capacity to recycle components of their cell wall.

### 339 **Biochemical and structural characterisation of LpqI**

340 In previously characterized PG-recycling systems free amino sugars are by a glycoside  
341 hydrolase family 3 enzyme named NagZ<sup>36</sup>. The CAZy glycoside hydrolase family 3 (GH3) is  
342 a large group of enzymes which have hydrolytic and phosphorylytic activity to remove  $\beta$ -linked  
343 sugars from proteins and polysaccharides<sup>37,38</sup>. The  $\beta$ -*N*-acetylglucosaminidase sub-family  
344 including all known NagZ enzymes utilize a conserved Asp-His catalytic dyad which has been  
345 well characterized<sup>39,40</sup>. A BLAST search of the *M. tuberculosis* H37Rv genome revealed only  
346 one NagZ ortholog, which was previously named LpqI in light of its identification as a  
347 lipoprotein including an appropriately positioned lipobox at the N-terminus of the protein<sup>41</sup>. As  
348 a lipoprotein LpqI is expected to be found attached to the periplasmic face of the cytoplasmic  
349 membrane, which is consistent with proteomics results<sup>41</sup>. LpqI has also been identified as a  
350 likely mannosylated glycoprotein in a proteomics screen using ConA chromatography<sup>42</sup>. The  
351 *lpqI* gene is found in all mycobacteria with sequenced genomes including *M. leprae* which has  
352 a substantially reduced genome (Figure 1, Table S1, Figure S5).

353 We cloned, expressed and purified the LpqI protein from *M. tuberculosis* H37Rv using  
354 an N-terminal His<sub>6</sub>-SUMO tag which was subsequently cleaved from the protein. While LpqI  
355 bears significant sequence similarity to known  $\beta$ -*N*-acetylglucosaminidases, recent studies have  
356 demonstrated that divergent activities for this sub-family of enzymes are possible<sup>38</sup>. These  
357 activities included the ability to release sugars other than GlcNAc from reporter substrates and  
358 apparent phosphorylytic activity. We first sought to determine if the protein was in fact a  $\beta$ -*N*-  
359 acetylglucosaminidase by testing its activity on a variety of substrates including many sugars  
360 that would be found in the cell wall of mycobacteria. Using convenient reporter sugars we  
361 assessed the ability for the enzyme to release *p*-nitrophenolate or 4-methylumbeliferone from

362 conjugated arabinose, galactose, galactosamine, arabinofuranose, glucose, mannose,  
363 mannosamine, glucosamine and *N*-acetylglucosamine (Figure 4a). While not exhaustive, this  
364 set of sugars covers most major modifications to the cell wall including the AG itself, *O*-  
365 mannose modifications of proteins, GalNAc modification of arabinan, the rhamnose-linker  
366 sugar of AG and the GlcNAc and GlcN found in PG. The only detectable activity for LpqI was  
367 with GlcNAc-containing substrates. Critically, this sugar is only found in the backbone of PG  
368 and a small amount in the linker unit (MurNAc-6-P-Rha-GlcNAc-galactan) between PG and  
369 arabinogalactan. We then evaluated the Michaelis-Menten kinetics of LpqI using 4MU-GlcNAc  
370 as a substrate with a similar  $k_{cat}$  ( $2.8 \times 10^{-2} \pm 0.04 \times 10^{-2} \cdot s^{-1}$ ) and  $K_m$  ( $106 \pm 5 \mu M$ ) as observed  
371 for other NagZ enzymes using this substrate (Figure 4b)<sup>39</sup>. In a similar assay we were also able  
372 to show that LpqI releases GlcNAc from soluble PG fragments (Figure 4c). While hydrolytic  
373 activity has been reported for most NagZ-type enzymes, a recent report suggested that  $\beta$ -*N*-  
374 acetylglucosaminidases from the GH3 family are in fact phosphorylases<sup>38</sup>. Another GH3  $\beta$ -*N*-  
375 acetylglucosaminidase was recently reported to lack this activity, suggesting that it may not be  
376 a general property of the family<sup>43</sup>. We tested the activity of the enzyme under the same  
377 conditions as reported previously for Nag3 from *Celulomonas fimi* and found that there was no  
378 detectable difference with our observed hydrolytic activity. The product of the reaction also co-  
379 migrated with GlcNAc on TLCs and not GlcNAc-1-P (Figure S3).

380 To further validate its role in PG-recycling we solved the 1.96 Å crystal structure of  
381 LpqI (PDB code: 6GFV; Figure 4d, S4, Table S3). LpqI consists of a single TIM-barrel domain  
382 similar to cytoplasmic Gram-negative orthologs but lacks the C-terminal domain associated  
383 with extracellular NagZ enzymes from some Gram-positive bacteria (Figure S4). Alignment of  
384 LpqI with the NagZ/GlcNAc/1,6-anhydroMurNAc complex from *Pseudomonas aeruginosa*  
385 (NagZ<sub>Pa</sub>; PDB:5G3R) or NagZ from *Bacillus subtilis* (PDB:4GYJ) resulted in a root-mean-  
386 square deviation of 0.96 Å and 1.01 Å respectively (Figure S4). Superposition of the post-

387 cleavage NagZ<sub>Pa</sub> complex with LpqI indicates that the appropriate coordinating residues for  
388 substrate recognition are intact in LpqI, supporting its role in PG-recycling (Figure 4d).

### 389 **Characterisation of a $\Delta lpqI$ mutant**

390 To evaluate the role of LpqI in muropeptide recovery, we constructed a mutant strain of  
391 *M. bovis* BCG lacking *lpqI* using specialized transduction and confirmed the mutant by PCR<sup>16</sup>.  
392 A whole cell  $\beta$ -*N*-acetylglucosaminidase assay clearly shows that *M. bovis* BCG  $\Delta lpqi$  is devoid  
393 of  $\beta$ -*N*-acetylglucosaminidase activity as the amount of 4MU released is not significantly  
394 different from the spontaneous release in sterile media (Figure 3b). This deficiency is  
395 complemented by replacement of the *lpqI* gene at a distal chromosomal location under the  
396 control of its native promoter ( $\Delta lpqi::lpqI$ ) and is not complemented by the empty vector  
397 ( $\Delta lpqi::EV$ ) (Figure 3b). Growth of  $\Delta lpqi$  *in vitro* is unaltered as compared to the wild-type  
398 (Figure 3c).

399 The order in which muropeptides are recycled, and the chemical structure of the  
400 recycled material is critical for the immune sensing of the bacterium. To determine the order of  
401 PG-recycling steps, we first determined the impact of the loss of *lpqI* on the recycling of cell  
402 wall material. We repeated the radio-label incorporation assay described above with the mutant  
403 and observed that the  $\Delta lpqI$  was able to incorporate <sup>3</sup>H stem-peptides from soluble PG as  
404 efficiently as the wild-type (Figure 3b). Consistent with these observations, when we followed  
405 release of pre-labelled cells for release of <sup>3</sup>H DAP into the culture media, we observed no  
406 significant differences between the wild-type and the  $\Delta lpqI$  strain (Figure 3c). This experiment  
407 reported on the recycling of stem-peptides, however it did not indicate if the mutant strain was  
408 still recycling MurNAc. To test this directly we evaluated the ability of the  $\Delta lpqI$  strain to grow  
409 on MurNAc, glycerol and PG. The  $\Delta lpqI$  strain was not deficient for growth on MurNAc or  
410 glycerol, however unlike the wild-type strain it was unable to grow on PG as a sole-carbon  
411 source (Figure 3d). Similarly, the  $\Delta lpqI$  strain incorporated significantly fewer <sup>14</sup>C-GlcNAc-



412 labelled muropeptides (Figure 3a). Together these data indicate that *in vitro* *lpqI* is required for  
413 amino-sugar recycling, but is not necessary for stem-peptide recycling or release.

414         Given that NagZ-like proteins have been found to play a role in  $\beta$ -lactam sensitivity in  
415 other bacteria we sought to determine the antibiotic sensitivity of the  $\Delta$ *lpqI* strain. In contrast  
416 to inhibition of *P. aeruginosa* NagZ, deletion of *lpqI* resulted in a significant increase in survival  
417 for lysozyme and all cell-wall active antibiotics tested (Figure 5a-d)<sup>44</sup>. A smaller impact on  
418 survival in the presence of the protein synthesis inhibitor chloramphenicol was observed  
419 (Figure 5e). This increase in resistance is not likely due to a change in cell-wall permeability as  
420 determined by ethidium bromide uptake (Figure 5f).

#### 421 ***In vitro* characterization of a $\Delta$ *lpqI* mutant**

422         We next sought to determine the impact of the loss of *lpqI* on host responses to infection.  
423 Bone-marrow derived macrophages were infected with *M. bovis* BCG WT,  $\Delta$ *lpqi*,  $\Delta$ *lpqi::lpqi*  
424 and  $\Delta$ *lpqi::EV* at an MOI of 2 and evaluated for total colony forming units (CFU) at 4h and 4  
425 days post-infection. While no significant differences were observed at 4 h post-infection, a log-  
426 increase in CFUs was observed in the  $\Delta$ *lpqI* and  $\Delta$ *lpqI::empty* vector strains as compared to the  
427 wild-type or complemented mutant (Figure 6). This striking result indicated that although  
428 bacteria uptake by macrophages is independent of LpqI, growth of *M. bovis* BCG in the  
429 macrophage is controlled in a *lpqI*-dependent manner.

430         As a result of the apparent increase in fitness of a  $\Delta$ *lpqI* strain under the conditions tested  
431 we analyzed all available *M. tuberculosis* genomic sequences using BLAST for mutations in  
432 the *lpqI* coding or promoter regions. We were unable to identify any deletions/mutations in the  
433 promoter region for this protein and all identified mutations in the coding sequence were in  
434 positions unlikely to be involved in catalysis or binding or were conservative mutations and  
435 thus unlikely to impact function.

## 436 Discussion

437 In an attempt to develop diagnostic media for the identification of mycobacteria, several  
438 groups in the 1960s observed that *M. tuberculosis* and most other mycobacteria could not  
439 metabolise GlcNAc as a sole carbon-source<sup>33,34</sup>. This, along with the absence of known PG  
440 recycling-associated genes lead to the assumption that PG recycling is absent in pathogenic  
441 mycobacteria. Our sole-carbon source assays indicate that while the bacteria are unable to  
442 metabolise GlcNAc, surprisingly they can metabolise MurNAc (Figure 2). This is despite the  
443 fact that they lack an ortholog of the only known lactyl-etherase, MurQ which cleaves an  
444 otherwise stable lactyl-ether in the cytoplasm of most model organisms (Figure 1). Our data  
445 indicate that rather than using the GlcNAc portion of the sugar, the bacteria are cleaving the  
446 lactyl-ether and capable of metabolising the liberated lactate. During our study we found that  
447 *M. bovis* BCG was only able to grow on MurNAc under aerated conditions. This was also found  
448 to be the case for L- but not D-lactate which served as a much better carbon source under O<sub>2</sub>  
449 limiting conditions. As MurNAc is a combination of D-lactate and GlcNAc, we can predict that  
450 the lactyl etherase acting on MurNAc is likely proceeding *via* an inverting mechanism. The  
451 presence of a specific lactyl-etherase is supported by the turnover of a 4MU-D-lactate reporter  
452 compound by *M. bovis* BCG. The O<sub>2</sub> dependence of this growth is intriguing as N-glycolylation  
453 is also an O<sub>2</sub>-dependent activity, suggesting significant alterations to PG metabolism in hypoxic  
454 vs. aerobically growing mycobacteria<sup>45</sup>. Consistent with this observation, Rv0237 has a 2-fold  
455 upregulation during re-aeration after re-activation from non-replicating persistence in the  
456 Wayne hypoxia model<sup>46</sup>.

457 Autolytic enzymes that cleave the glycan backbone of PG such as glucosaminidases,  
458 lytic transglycosylases and lysozymes generally produce disaccharides. As such, free MurNAc  
459 is unlikely to be generated by the known complement of autolytic enzymes in TB. We therefore  
460 sought to identify the biochemical source of free amino-sugars which would feed a PG-

461 recycling system. To do this, we biochemically and structurally characterised the predicted  
462 mycobacterial NagZ ortholog, LpqI demonstrating that it is an authentic  $\beta$ -N-  
463 acetylglucosaminidase which is active against PG fragments. Consistent with a role in PG-  
464 recycling, *M. bovis* BCG  $\Delta$ lpqI is unable to grow on soluble PG as a sole carbon source, while  
465 recycling of the stem-peptide is unaltered in this mutant (Figure 3). Furthermore, uptake of  
466 radio-labelled stem peptides was unchanged in the  $\Delta$ lpqI mutant whereas  $^{14}\text{C}$  GlcNAc-  
467 muropeptides show a significant decrease in incorporation (Figure 3). Together, these data  
468 demonstrate that *M. bovis* BCG and *M. tuberculosis* remove the stem-peptide from PG-  
469 fragments prior to disaccharide cleavage and lactyl-ether removal (Figure 7). The processing  
470 of GlcNAc-MurNAc by LpqI prior to lactyl-ether cleavage is also supported by our LpqI crystal  
471 structure in which the lactate-binding residue R67 from the *P. aeruginosa* structure is conserved  
472 (LpqI: R130).

473         The fate of GlcNAc in this pathway remains unclear, although our data and prior  
474 observations suggest that the bacteria do not re-use this sugar. This is surprising given the  
475 conservation of the *nagA* (Rv3332) gene in mycobacteria, however it is possible that an  
476 alternative pathway exists which involves intermediates not generated under the conditions we  
477 have tested. This is hinted at with our  $^{14}\text{C}$ -labelled muropeptides where incorporation of the  
478 labelled-GlcNAc is not expected given the lack of GlcNAc utilisation by the cells. It is likely  
479 that at least some portion of the labelled material is labelled at MurNAc rather than GlcNAc  
480 and that the sugar moiety is in fact used as some alternative reaction product upon cleavage of  
481 the lactyl-ether. Bacterial etherases comprise a diverse number of mechanisms and potential  
482 reaction products and so a product other than free GlcNAc is entirely possible<sup>47</sup>. We are  
483 currently trying to identify and characterise this enzyme.

484         The recycling of bacterial PG has immense implications for the host-pathogen  
485 relationship. PG has been shown to be a pathogen-associated molecular pattern and is detected  
486 by many different specialised host receptors<sup>8,48</sup>. Of most relevance to *M. tuberculosis* is the

487 NOD2 receptor which senses intracellular muramyl-dipeptide (MurNAc-L-Ala-D-isoGlu) as a  
488 minimal motif<sup>8</sup>. The immunogenicity of Freund's complete adjuvant, for example, is driven by  
489 the presence of mycobacterial PG and its *N*-glycolyl modification<sup>49</sup>. Despite this, Hansen and  
490 colleagues observed that the detection of *M. tuberculosis* by the immune system *via* Nod2 is  
491 weaker than expected, with equal preparations of dead bacteria having substantially more  
492 NOD2-stimulatory activity than wild-type bacteria<sup>50</sup>. The authors of that study speculated that  
493 this was either due to active repression of the immune system or a reduction in the amount of  
494 free NOD2-stimulatory effectors in live bacteria.

495         In our work, we have shown that mycobacteria recycle their PG by first cleaving the  
496 stem peptide from the glycan backbone, and subsequently recycle the MurNAc portion of the  
497 glycan, removing the D-lactate. This step-wise activity, starting with stem peptide removal,  
498 would dramatically reduce the release of NOD2-stimulatory molecules, especially given that  
499 this activity is happening beneath the mycomembrane, where diffusion of muropeptides is  
500 expected to be highly restricted. Heat-killing of these bacteria would allow host-derived  
501 lysozymes to release muropeptides and for those muropeptides to be able to diffuse and  
502 stimulate NOD2 and other receptors. In line with this, our preliminary analysis suggest that  
503 absence of LpqI does not alter the production of cytokines by infected bone-marrow-derived  
504 macrophages (data not shown).

505         Deletion of the *lpqI* gene from *M. bovis* BCG yielded several surprising observations.  
506 Impaired PG recycling has resulted in a strain that is more resistant to both lysozyme and several  
507 antibiotics while not affecting growth *in vitro*. We are currently investigating the mechanistic  
508 basis for this, though it is not likely due to a change in permeability of the cell wall (Figure 5).  
509 In other bacteria cell wall damage can trigger various stress responses, and so it is likely that a  
510 build-up of GlcNAc-MurNAc disaccharides may trigger a stress-like response in  
511 mycobacteria<sup>51</sup>. Consistent with this *lpqI* is encoded adjacent to a universal stress response  
512 protein in several mycobacteria (Figure S5).

513           Loss of this gene has also resulted in a substantial increase in growth in bone-marrow  
514   derived macrophages (Figure 6) suggesting that cell-wall turnover may act as a growth-rate  
515   modulator *in vivo*. Despite these apparent fitness advantages, the *lpqI* gene appears to be intact  
516   in virtually all mycobacteria for which sequence data is publicly available, and observed  
517   mutations are unlikely to impact catalysis (Figure S5). This suggests that there is a fitness cost  
518   to the inactivation of this gene and warrants further investigation, perhaps in whole organismal  
519   models. One possibility is that under stress-conditions mycobacteria may be able to scavenge  
520   PG fragments from nearby dead cells allowing a small population to re-grow following mass  
521   lysis. This is consistent with the observation that PG can lead to resuscitation of dormant  
522   mycobacteria<sup>52</sup>. Alternatively,  $\Delta lpqI$ -driven excessive growth in the macrophage may prevent  
523   the development of a stable, long-term infection. PG recycling has also been shown to be critical  
524   for Gram-positive bacteria in stationary phase, though our data do not support this requirement  
525   for *M. bovis* BCG, it is possible that it is more important in the host<sup>53</sup>.

526           In conclusion, we have identified for the first time a PG recovery pathway in pathogenic  
527   mycobacteria. We have shown that this occurs in a step-wise fashion by removing stem-peptide  
528   from PG and subsequently cleaving the PG-disaccharide and finally releasing the D-lactate from  
529   free MurNAc, most likely *via* an inverting mechanism. Finally, recycling of PG by these  
530   bacteria is important for lysozyme and antibiotic tolerance, while deletion of this system results  
531   in a significant growth advantage for these bacteria in macrophages.

## 532   **Acknowledgements**

533   We wish to thank Sudagar S. Gurcha and Albel Singh for technical assistance. P.J.M. wishes  
534   to acknowledge support in the form of a Future Leader Fellowship from the UK Biotechnology  
535   and Biological Sciences Research Council (BB/N011945/1). G.V.M. would like to  
536   acknowledge funding from UK Biotechnology and Biological Sciences Research Council  
537   (BB/P001513/1). A.L.L. acknowledges funding from UK Biotechnology and Biological  
538   Sciences Research Council (BB/J015229/1). M.S. would like to acknowledge funding as an  
539   Associate FCT-investigator. G.S.B would like to acknowledge support in the form of a Personal  
540   Research Chair from Mr James Bardrick and the UK Medical Research Council (grant  
541   MR/K012118/1).

542  
543  
544

545

546

547 **Author Contributions**

548 Conceived of the study: P.J.M. Conceived and designed the experiments: P.J.M., G.V.M., M.S.,

549 A.L.L., G.S.B. Performed the experiments: P.J.M., A.R.M., I.T.C, N.V., M.J., M.C. Analysed

550 the data: P.J.M., A.R.M., I.T.C, N.V., M.C. G.V.M., M.S., A.L.L., G.S.B. Wrote and edited

551 the paper: P.J.M, G.V.M., M.S., A.L.L., G.S.B.

552

## 553 Figures and Tables

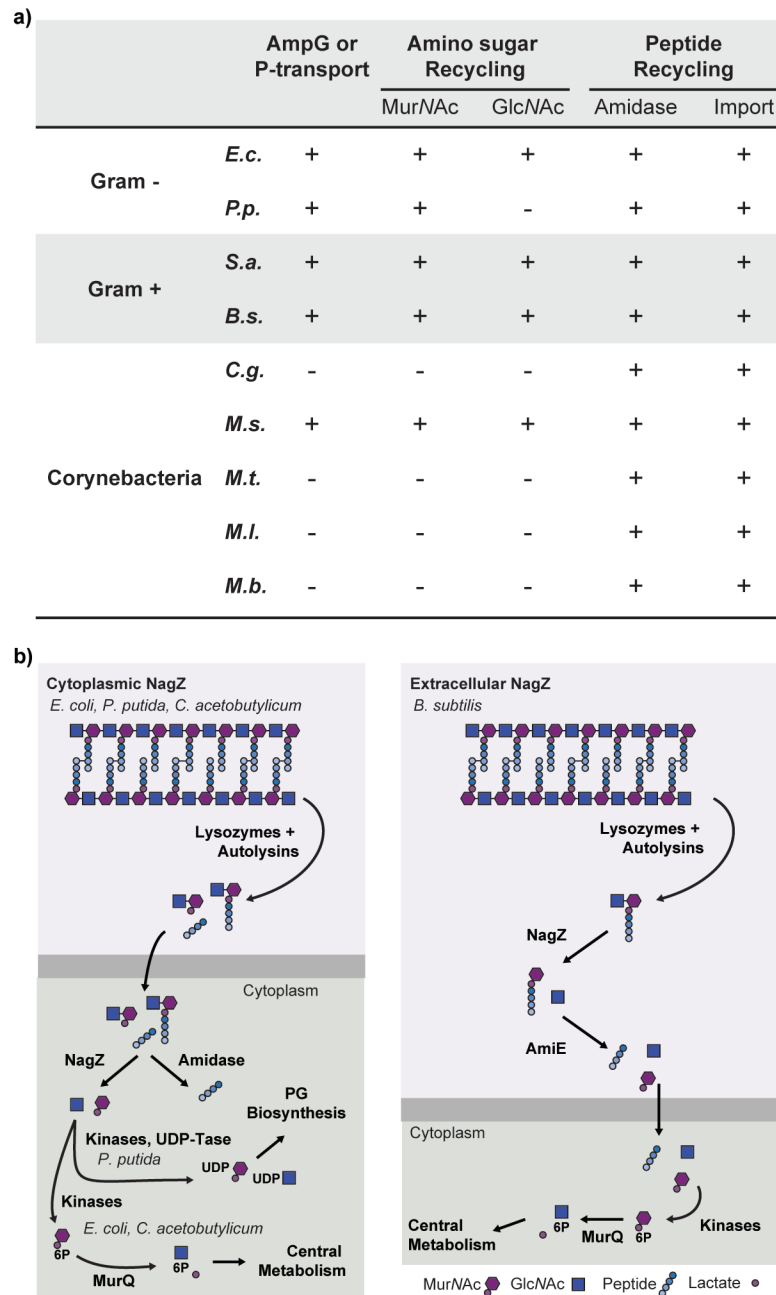

554  
555

556 **Figure 1. Overview of PG-recycling.** a) The genes involved in PG-recycling fall into  
557 functional groups that are typically conserved amongst closely related species, with two major  
558 MurNAc recovery systems so far identified (AnmK/MurQ and AngK/MurU). b) For a complete  
559 listing of gene conservation see Table S1. The PG recycling machinery is variable with respect  
560 to the localisation of NagZ and the subsequent conversion to GlcNAc-1P or UDP-  
561 GlcNAc/MurNAc. All known MurNAc recovery systems that sustain bacterial growth (as  
562 opposed to strictly recycling e.g. *P. putida*) terminate at MurQ in the cytoplasm. *E.c.* – *E. coli*,  
563 *P.p* – *P. putida*, *S.a.* – *Staphylococcus aureus*, *B.s.* – *Bacillus subtilis*, *C.g.* – *Corynebacterium*  
564 *glutamicum*, *M.s.* – *M. smegmatis*, *M.t.* – *M. tuberculosis*, *M.l.* *M. leprae*, *M. b.* – *M. bovis* BCG.

565  
566  
567  
568

569  
570

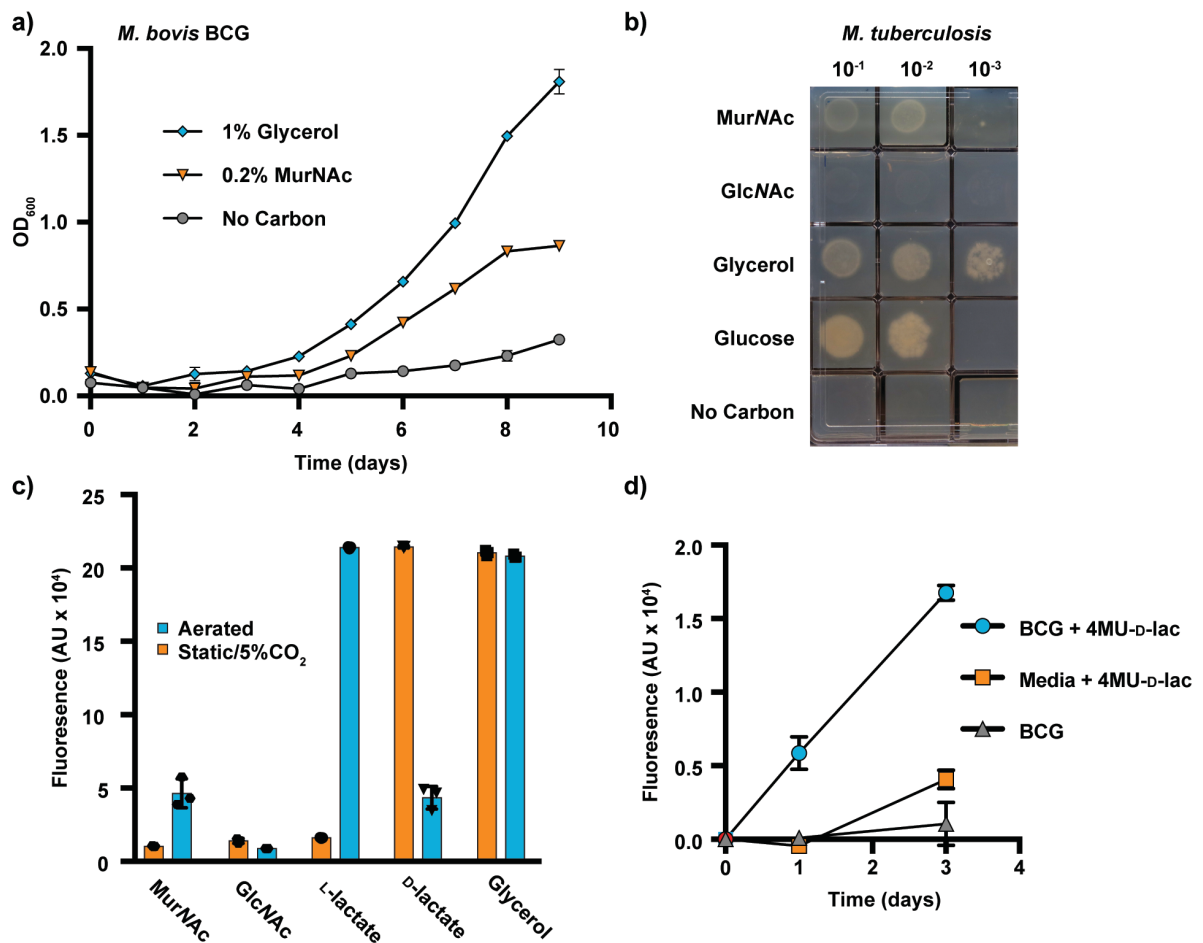

571  
572  
573  
574  
575  
576  
577  
578  
579  
580  
581  
582

**Figure 2. *M. tuberculosis* and *M. bovis* BCG are able to recycle MurNAc.** **a)** *M. bovis* BCG WT was inoculated at a starting OD<sub>600</sub> of 0.1 in minimal media containing glycerol and tyloxopol, MurNAc or no carbon and growth was monitored daily by taking OD<sub>600</sub> readings at the indicated concentrations (n = 3). **b)** *M. tuberculosis* H37Rv was washed and then serially diluted into fresh carbon-free minimal media. 10  $\mu$ L of each dilution was spotted onto Sauton's agar containing the indicated carbon sources at 5 mM. **c)** Growth of *M. bovis* BCG on 5 mM MurNAc, GlcNAc, L-lactate, D-lactate, and glycerol was evaluated in aerated or static 5% CO<sub>2</sub> cultures using a resazurin assay (n = 3). **d)** Mid-exponential *M. bovis* BCG was grown in minimal media with 5 mM glycerol including 1 mM 4MU-D-lactate with constant agitation. At the indicated times the 4MU fluorescence of the samples was determined (n = 3).



583

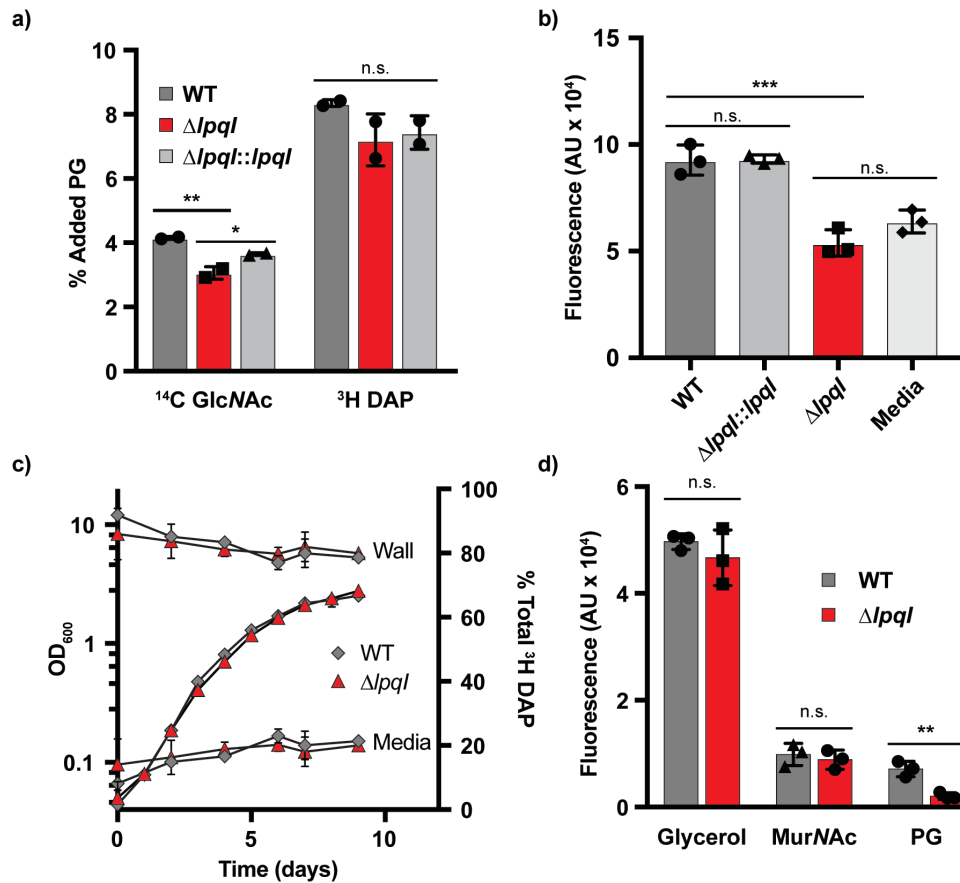

584

585

586 **Figure 3. *M. bovis* BCG is able to recycle PG.** a) *M. bovis* BCG WT,  $\Delta lpqI$  and  $\Delta lpqI::lpqI$

587 were incubated with 30,000 CPM of  $^{14}\text{C}$  GlcNAc-labelled muropeptides or 100,000 CPM of

588  $^3\text{H}$  DAP-labelled muropeptides for 10 days after which the cell wall material was isolated and

589 subjected to liquid scintillation counting (n = 2). b) The same strains were incubated with 1

590 mM 4MU-GlcNAc in minimal media. After 3 days the fluorescence of the cultures were

591 measured (n = 3). c) *M. bovis* BCG WT and  $\Delta lpqI$  were simultaneously evaluated for release of

592 cell wall peptides and growth (n = 3). d) The same strains were evaluated for their growth using

593 glycerol, MurNAc and PG as sole carbon sources using a resazurin assay (n = 3; \*\*\* = p <

594 0.001; \*\* = p < 0.005).

594

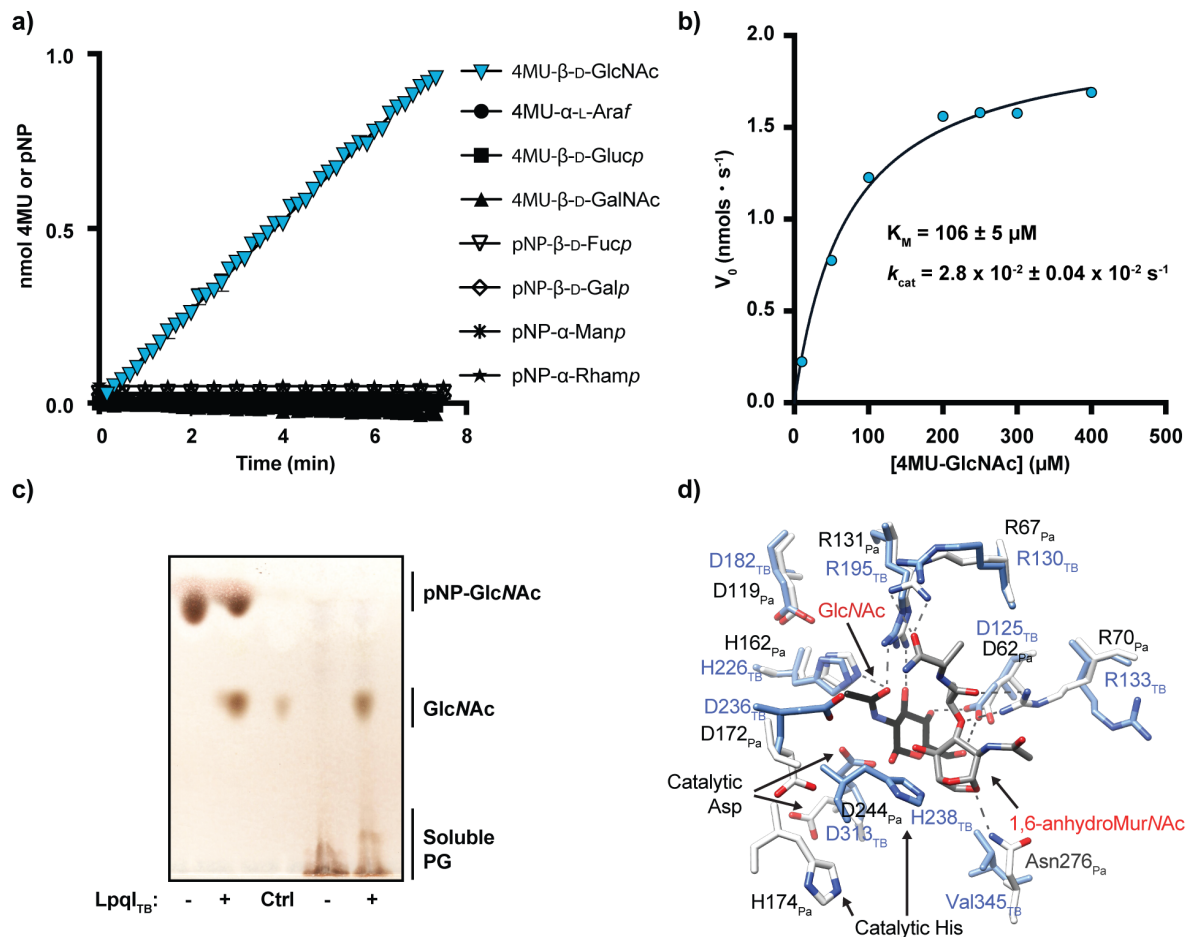

595  
596  
597  
598  
599  
600  
601  
602  
603  
604  
605

**Figure 4. Lpql is an authentic NagZ-type enzyme. a)** Reactions including 1 μM Lpql and the indicated chromogenic substrates at 1 mM were incubated at 37 °C and release of pNP or 4MU was followed by absorbance or fluorescence respectively. **b)** Lpql was incubated with increasing concentrations of 4MU-GlcNAc. The rate of 4MU release was plotted and the curve fit with the Michaelis-Menton equation using GraphPad Prism 7.0. (n = 3) **c)** Lpql is able to release GlcNAc from soluble mucopeptides derived from *M. smegmatis* mc<sup>2</sup>155 PG. **d)** The active site of Lpql is highly conserved as evidenced by the nearly identical positioning of key binding residues observed in the GlcNAc, 1,6-anhydroMurNAc complex with NagZ<sub>Pa</sub> (PDB: 5G3R) with an overall RMSD of 1.01 Å.

606  
607  
608  
609

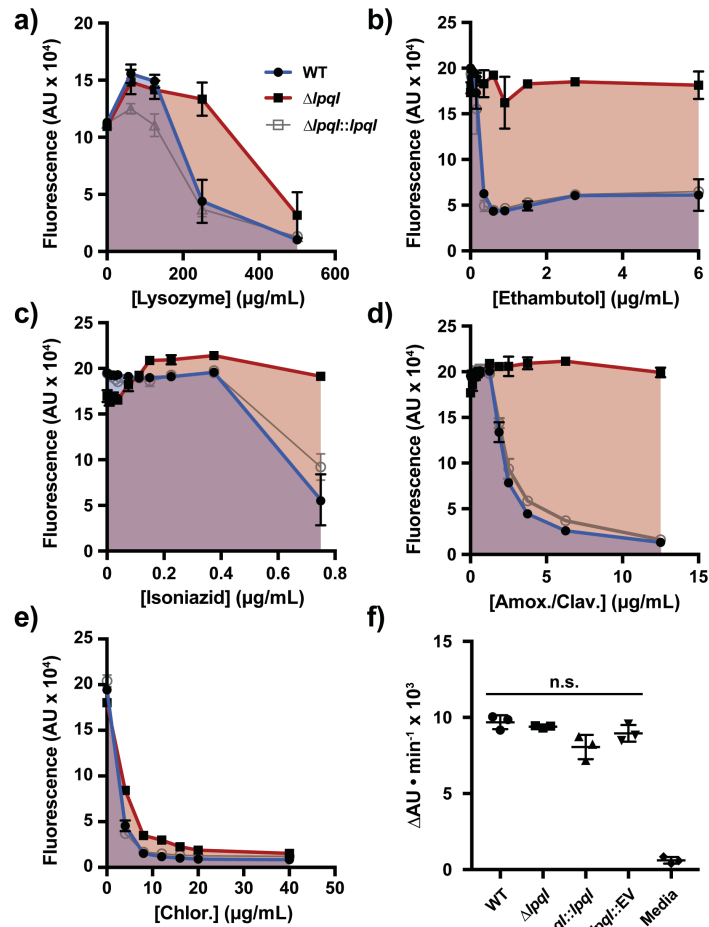

610  
611  
612  
613  
614  
615  
616  
617  
618  
619

**Figure 5. Loss of LpqI leads to lysozyme and antibiotic resistance.** a-e) *M. bovis* BCG WT,  $\Delta lpqI$  and  $\Delta lpqI::lpqI$  were incubated with increasing concentrations of lysozyme or antibiotics at a starting OD<sub>600</sub> of 0.1. After 7 days incubation total growth was assessed using a resazurin assay, where total fluorescence correlates with respiration and growth (n = 3). f) *M. bovis* BCG WT,  $\Delta lpqI$  and  $\Delta lpqI::lpqI$  and  $\Delta lpqI::EV$  were incubated with EtBr and the rate of EtBr was monitored as an increase in fluorescence. No significant differences were found in pairwise t-tests across all strains (n = 3).

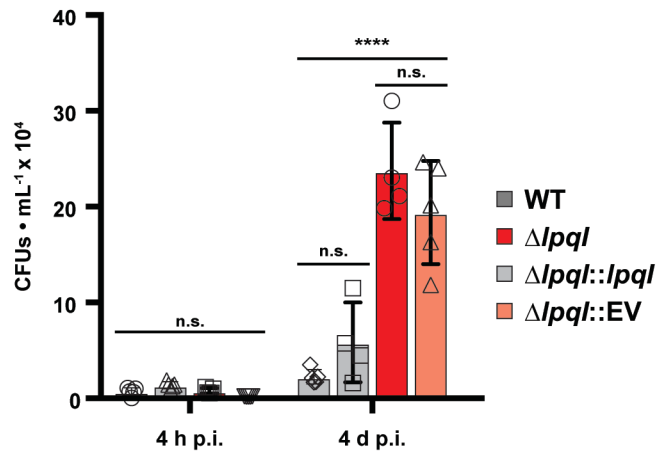

620  
621  
622  
623  
624  
625

**Figure 6. Loss of *lpqI* leads to increased growth in BMDMs.** Freshly prepared BMDs were infected with the indicated strains at a multiplicity of infection of 2 and incubated for at 37 °C. At the indicated times the macrophages were lysed with saponin and CFUs were measured on 7H11 agar after 3 weeks incubation (n ≥ 4; \*\*\*\* = p < 0.0001).

626  
627  
628  
629  
630  
631  
632  
633  
634  
635  
636  
637  
638  
639  
640  
641  
642

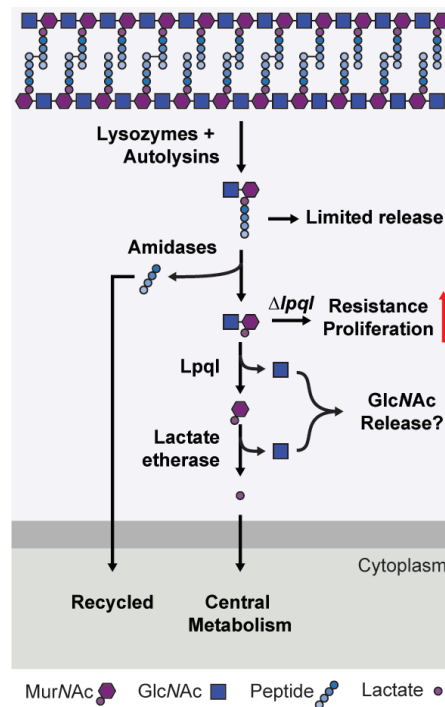

643  
644  
645  
646  
647  
648  
649  
650  
651  
652  
653  
654  
655

**Figure 7. Peptidoglycan recovery pathway in pathogenic mycobacteria.** Based on our observations we can propose the following model for PG recycling and recovery in mycobacteria. Cleavage of the cell wall by endogenous autolysins or host-derived lysozyme generates muropeptides. These are subsequently degraded by amidases. Lpql then cleaves the disaccharide which is followed by D-lactyl-ether cleavage. Lactate can then be used by the cell under aerobic conditions and GlcNAc (or its derivatives) are released. Perturbation of this system by inhibiting Lpql leads to increased resistance to anti-mycobacterial agents as well as increased proliferation in the host.

## 656 References

- 657 1. Santin, Y. G. & Cascales, E. Domestication of a housekeeping transglycosylase for  
658 assembly of a Type VI secretion system. *EMBO Rep.* **18**, 138–149 (2017).
- 659 2. Höltje, J. V. Growth of the stress-bearing and shape-maintaining murein sacculus of  
660 *Escherichia coli*. *Microbiol. Mol. Biol. Rev.* **62**, 181–203 (1998).
- 661 3. Reith, J. & Mayer, C. Peptidoglycan turnover and recycling in Gram-positive bacteria.  
662 *Appl Microbiol Biotechnol* **92**, 1–11 (2011).
- 663 4. Johnson, J. W., Fisher, J. F. & Mobashery, S. Bacterial cell-wall recycling. *Ann. N. Y.*  
664 *Acad. Sci.* **1277**, 54–75 (2013).
- 665 5. Cookson, B. T., Tyler, A. N. & Goldman, W. E. Primary structure of the  
666 peptidoglycan-derived tracheal cytotoxin of *Bordetella pertussis*. *Biochemistry* **28**,  
667 1744–1749 (1989).
- 668 6. Melly, M. & McGee, Z. Ability of monomeric peptidoglycan fragments from *Neisseria*  
669 *gonorrhoeae* to damage human fallopian-tube mucosa. *J Infect Dis* (1984).
- 670 7. Koropatnick, T. A. *et al.* Microbial factor-mediated development in a host-bacterial  
671 mutualism. *Science* **306**, 1186–1188 (2004).
- 672 8. Girardin, S. E. *et al.* Nod1 detects a unique muropeptide from Gram-negative bacterial  
673 peptidoglycan. *Science* **300**, 1584–1587 (2003).
- 674 9. Goodell, E. W. Recycling of murein by *Escherichia coli*. *J Bacteriol* **163**, 305–310  
675 (1985).
- 676 10. Gisin, J., Schneider, A., Nägele, B., Borisova, M. & Mayer, C. A cell wall recycling  
677 shortcut that bypasses peptidoglycan de novo biosynthesis. *Nat Chem Biol* **9**, 491–493  
678 (2013).
- 679 11. Jankute, M., Cox, J. A. G., Harrison, J. & Besra, G. S. Assembly of the Mycobacterial  
680 Cell Wall. *Annu Rev Microbiol* **69**, 405–423 (2015).
- 681 12. Moynihan, P. J. & Besra, G. S. Colworth prize lecture 2016: exploiting new biological  
682 targets from a whole-cell phenotypic screening campaign for TB drug discovery.  
683 *Microbiology* **163**, 1385–1388 (2017).
- 684 13. Diacon, A. H. *et al.*  $\beta$ -Lactams against Tuberculosis--New Trick for an Old Dog? *N.*  
685 *Engl. J. Med.* **375**, 393–394 (2016).
- 686 14. Deshpande, D. *et al.* Ceftazidime-avibactam has potent sterilizing activity against  
687 highly drug-resistant tuberculosis. *Science Advances* **3**, e1701102 (2017).
- 688 15. Sauton, B. Sur la nutrition minerale du bacille tuberculeux. *C. R. Acad. Sci* **155**, 860–  
689 862 (1912).
- 690 16. Bardarov, S. *et al.* Specialized transduction: an efficient method for generating marked  
691 and unmarked targeted gene disruptions in *Mycobacterium tuberculosis*, *M. bovis* BCG  
692 and *M. smegmatis*. *Microbiology* **148**, 3007–3017 (2002).
- 693 17. Stover, C. K. *et al.* New use of BCG for recombinant vaccines. *Nature* **351**, 456  
694 (1991).
- 695 18. Hancock, I. C., Carman, S., Besra, G. S., Brennan, P. J. & Waite, E. Ligation of  
696 arabinogalactan to peptidoglycan in the cell wall of *Mycobacterium smegmatis* requires  
697 concomitant synthesis of the two wall polymers. *Microbiology (Reading, Engl)* **148**,  
698 3059–3067 (2002).
- 699 19. Shenderov, K. *et al.* Cord Factor and Peptidoglycan Recapitulate the Th17-Promoting  
700 Adjuvant Activity of Mycobacteria through Mincle/CARD9 Signaling and the  
701 Inflammasome. *J Immunol* **190**, 5722–5730 (2013).
- 702 20. Moynihan, P. J. & Clarke, A. J. Substrate Specificity and Kinetic Characterization of  
703 Peptidoglycan O-Acetyltransferase B from *Neisseria gonorrhoeae*. *Journal of*  
704 *Biological Chemistry* **289**, 16748–16760 (2014).

- 705 21. Jarle Horn, S. & Eijsink, V. G. H. A reliable reducing end assay for chito-  
706 oligosaccharides. *Carbohydrate Polymers* **56**, 35–39 (2004).
- 707 22. Chimichi, S., Boccalini, M., Cravotto, G. & Rosati, O. A new convenient route to  
708 enantiopure 2-coumarinyloxypropanals: application to the synthesis of optically active  
709 geiparvarin analogues. *Tetrahedron Lett.* **47**, 2405–2408 (2006).
- 710 23. Chimichi, S. *et al.* Synthesis and biological evaluation of new geiparvarin derivatives.  
711 *ChemMedChem* **4**, 769–779 (2009).
- 712 24. Carmona, J. *et al.* *Mycobacterium tuberculosis* Strains Are Differentially Recognized  
713 by TLRs with an Impact on the Immune Response. *PLoS ONE* **8**, e67277 EP – (2013).
- 714 25. Machowski, E. E., Senzani, S. & Ealand, C. Comparative genomics for mycobacterial  
715 peptidoglycan remodelling enzymes reveals extensive genetic multiplicity. *BMC*  
716 *Microbiol.* **14**, 75 (2014).
- 717 26. Nikitushkin, V. D. *et al.* A product of RpfB and RipA joint enzymatic action promotes  
718 the resuscitation of dormant mycobacteria. *FEBS J* **282**, 2500–2511 (2015).
- 719 27. Bellinzoni, M. *et al.* Structural studies suggest a peptidoglycan hydrolase function for  
720 the *Mycobacterium tuberculosis* Tat-secreted protein Rv2525c. *J Struct Biol* **188**, 156–  
721 164 (2014).
- 722 28. Takeya, K., Hitsatsune, K. & Nakashima, R. A cell-wall mucopeptide complex  
723 obtained from the culture filtrate of tubercle bacilli. *Biochim Biophys Acta* **54**, 595–597  
724 (1961).
- 725 29. Ruscitto, A. *et al.* Identification of a novel *N*-acetylmuramic acid (MurNAc)  
726 transporter in *Tannerella forsythia*. *J Bacteriol* JB.00473–16 (2016).  
727 doi:10.1128/JB.00473-16
- 728 30. Marrero, J., Trujillo, C., Rhee, K. Y. & Ehrt, S. Glucose phosphorylation is required  
729 for *Mycobacterium tuberculosis* persistence in mice. *PLoS Pathog* **9**, e1003116–  
730 e1003116 (2013).
- 731 31. Yem, D. Purification and properties of  $\beta$ -*N*-acetylglucosaminidase from *Escherichia*  
732 *coli*. *J Bacteriol* (1976).
- 733 32. White, R. J. Control of amino sugar metabolism in *Escherichia coli* and isolation of  
734 mutants unable to degrade amino sugars. *Biochem J* **106**, 847–858 (1968).
- 735 33. Tsukamura, M. Identification of mycobacteria. *Tubercle* **48**, 311–338 (1967).
- 736 34. Bowles, J. A. & Segal, W. Kinetics of Utilization of Organic Compounds in the  
737 Growth of *Mycobacterium tuberculosis*. *J Bacteriol* **90**, 157–163 (1965).
- 738 35. Billig, S. *et al.* Lactate oxidation facilitates growth of *Mycobacterium tuberculosis* in  
739 human macrophages. *Scientific Reports* **7**, e10 (2017).
- 740 36. Cheng, Q., Li, H., Merdek, K. & Park, J. T. Molecular characterization of the  $\beta$ -*N*-  
741 acetylglucosaminidase of *Escherichia coli* and its role in cell wall recycling. *J*  
742 *Bacteriol* **182**, 4836–4840 (2000).
- 743 37. Lombard, V., Golaconda Ramulu, H., Drula, E., Coutinho, P. M. & Henrissat, B. The  
744 carbohydrate-active enzymes database (CAZy) in 2013. *Nucleic Acids Res* **42**, D490–  
745 D495 (2013).
- 746 38. Macdonald, S. S., Blaukopf, M. & Withers, S. G. *N*-Acetylglucosaminidases from  
747 CAZy Family GH3 Are Really Glycoside Phosphorylases, Thereby Explaining Their  
748 Use of Histidine as an Acid/Base Catalyst in Place of Glutamic Acid. *J Biol Chem* **290**,  
749 4887–4895 (2015).
- 750 39. Bacik, J.-P., Whitworth, G. E., Stubbs, K. A., Voadlo, D. J. & Mark, B. L. Active Site  
751 Plasticity within the Glycoside Hydrolase NagZ Underlies a Dynamic Mechanism of  
752 Substrate Distortion. *Chem. Biol.* **19**, 1471–1482 (2012).
- 753 40. Vadlamani, G. *et al.* Conformational flexibility of the glycosidase NagZ allows it to  
754 bind structurally diverse inhibitors to suppress  $\beta$ -lactam antibiotic resistance. *Protein*  
755 *Sci* **26**, 1161–1170 (2017).

- 756 41. Målen, H., Pathak, S., Søfteland, T., de Souza, G. A. & Wiker, H. G. Definition of  
757 novel cell envelope associated proteins in Triton X-114 extracts of *Mycobacterium*  
758 *tuberculosis* H37Rv. *BMC Microbiol.* **10**, 132 (2010).
- 759 42. González-Zamorano, M. *et al.* Mycobacterium tuberculosis glycoproteomics based on  
760 ConA-lectin affinity capture of mannosylated proteins. *J. Proteome Res.* **8**, 721–733  
761 (2009).
- 762 43. Ducatti, D. R. B., Carroll, M. A. & Jakeman, D. L. On the phosphorylase activity of  
763 GH3 enzymes: A  $\beta$ -N-acetylglucosaminidase from *Herbaspirillum seropedicae* SmR1  
764 and a glucosidase from *Saccharopolyspora erythraea*. *Carbohydr Res* **435**, 106–112  
765 (2016).
- 766 44. Zamorano, L. *et al.* NagZ Inactivation Prevents and Reverts  $\beta$ -lactam Resistance,  
767 Driven by AmpD and PBP 4 Mutations, in *Pseudomonas aeruginosa*. *Antimicrob*  
768 *Agents Chemother* **54**, 3557–3563 (2010).
- 769 45. Raymond, J. B., Mahapatra, S., Crick, D. C. & Martin S Pavelka, J. Identification of  
770 the *namH* Gene, Encoding the Hydroxylase Responsible for the N-Glycolylation of the  
771 Mycobacterial Peptidoglycan. *J Biol Chem* **280**, 326–333 (2005).
- 772 46. Du, P., Sohaskey, C. D. & Shi, L. Transcriptional and Physiological Changes during  
773 *Mycobacterium tuberculosis* Reactivation from Non-replicating Persistence. *Front.*  
774 *Microbiol.* **7**, R106 (2016).
- 775 47. White, G. F., Russell, N. J. & Tidswell, E. C. Bacterial scission of ether bonds.  
776 *Microbiol Rev* **60**, 216–232 (1996).
- 777 48. Charroux, B. *et al.* Cytosolic and Secreted Peptidoglycan-Degrading Enzymes in  
778 *Drosophila* Respectively Control Local and Systemic Immune Responses to  
779 Microbiota. *Cell Host & Microbe* **23**, 215–228.e4 (2018).
- 780 49. Behr, M. A. & Divangahi, M. Freund's adjuvant, NOD2 and mycobacteria. *Curr Opin*  
781 *Microbiol* **23**, 126–132 (2015).
- 782 50. Hansen, J. M. *et al.* N-Glycolylated Peptidoglycan Contributes to the Immunogenicity  
783 but Not Pathogenicity of *Mycobacterium tuberculosis*. *J Infect Dis* **209**, 1045–1054  
784 (2014).
- 785 51. Laubacher, M. E. & Ades, S. E. The Rcs phosphorelay is a cell envelope stress  
786 response activated by peptidoglycan stress and contributes to intrinsic antibiotic  
787 resistance. *J Bacteriol* **190**, 2065–2074 (2008).
- 788 52. Nikitushkin, V. D., Demina, G. R., Shleeva, M. O. & Kaprelyants, A. S. Peptidoglycan  
789 fragments stimulate resuscitation of ‘non-culturable’ mycobacteria. *Antonie Van*  
790 *Leeuwenhoek* **103**, 37–46 (2013).
- 791 53. Borisova, M. *et al.* Peptidoglycan Recycling in Gram-Positive Bacteria Is Crucial for  
792 Survival in Stationary Phase. *mBio* **7**, e00923–16 (2016).
- 793 54. Pettersen, E. F. *et al.* UCSF Chimera - A visualization system for exploratory research  
794 and analysis. *J. Comput. Chem.* **25**, 1605–1612 (2004).
- 795 55. Larkin, M. A. *et al.* Clustal W and Clustal X version 2.0. *Bioinformatics* **23**, 2947–  
796 2948 (2007).
- 797 56. Stamatakis, A. RAxML-VI-HPC: maximum likelihood-based phylogenetic analyses  
798 with thousands of taxa and mixed models. *Bioinformatics* **22**, 2688–2690 (2006).
- 799 57. Ashkenazy, H. *et al.* ConSurf 2016: an improved methodology to estimate and  
800 visualize evolutionary conservation in macromolecules. *Nucleic Acids Res* **44**, W344–  
801 50 (2016).
- 802
